# Supplementary material for: Photoenhanced sulfate formation by the heterogeneous uptake of SO 2 on non-photoactive mineral dust
Source: Copernicus journal article supplement (doi:10.5194/acp-24-6757-2024), 2024-06-12
Supplement: Supplementary file 1 [file acp-24-6757-2024-supplement.zip]

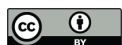

*Supplement of*

## **Photoenhanced sulfate formation by the heterogeneous uptake of SO<sub>2</sub> on non-photoactive mineral dust**

**Wangjin Yang et al.**

*Correspondence to:* Chong Han (hanch@smm.neu.edu.cn)

- [acp-24-6757-2024-supplement-title-page.pdf](#)
- [The Supporting Information.docx](#)

The copyright of individual parts of the supplement might differ from the article licence.
